# Supplementary material
Source: bioRxiv or medRxiv preprint supplement (https://medrxiv.org/content/medrxiv/early/2021/07/06/2021.07.04.21259848/DC1/embed/media-1.pdf)
Supplement: Supplementary file [file media-1.pdf]

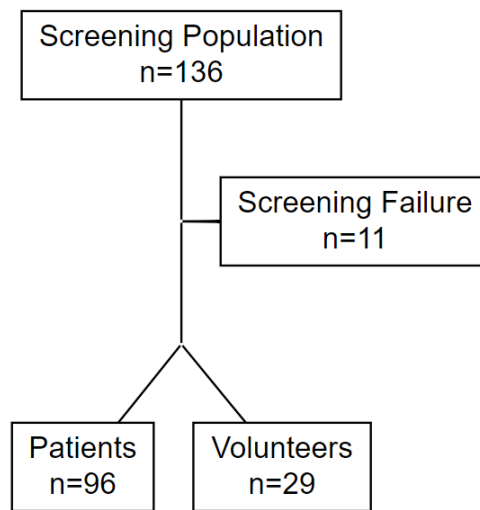

**Supplementary Figure 1:** Flowchart of screening and grouping of patients and healthy volunteers in the RituxiVac study.
